# Supplementary material
Source: PubMed Central journal article supplement (PMC4123931)
Supplement: es502201s_si_001.pdf [file es502201s_si_001.pdf]

## Personal and indoor PM<sub>2.5</sub> exposure from burning solid fuels in vented and unvented stoves in a rural region of China with a high incidence of lung cancer - Supporting Information

Wei Hu<sup>1#</sup>, George S. Downward<sup>2#</sup>, Boris Reiss<sup>2</sup>, Jun Xu<sup>1</sup>, Bryan A. Bassig<sup>1</sup>, Dean Hosgood<sup>1</sup>, Linlin Zhang<sup>3</sup>, Wei Jie Seow<sup>1</sup>, Guoping Wu<sup>3</sup>, Robert S. Chapman<sup>4</sup>, Linwei Tian<sup>5</sup>, Fusheng Wei<sup>3S</sup>, Roel Vermeulen<sup>2S</sup>, Qing Lan<sup>1S</sup>

<sup>1</sup>Division of Cancer Epidemiology and Genetics, National Cancer Institute, National Institutes of Health, Department of Health and Human Service, Rockville, MD, USA

<sup>2</sup>Institute for Risk Assessment Sciences, Division of Environmental Epidemiology, Utrecht University, Utrecht, The Netherlands

<sup>3</sup>China National Environmental Monitoring Center, Beijing, China

<sup>4</sup>College of Public Health Sciences, Chulalongkorn University, Bangkok, Thailand

<sup>5</sup>Chinese University of Hong Kong, Hong Kong

#: Co-first author; S: These authors co-supervised this work.

| Supplementary Table                                                                                                                              | Page |
|--------------------------------------------------------------------------------------------------------------------------------------------------|------|
| Supplementary Table S1 - Variables considered for inclusion in mixed model creation                                                              | S2   |
| Supplementary Table S2 - Linear mixed effect model indicating variables which contribute to differences between indoor and personal measurements | S3   |
| Supplementary Table S3 - Linear mixed effect modelling of ln-transformed indoor PM <sub>2.5</sub> exposure                                       | S4   |

**Supplementary Table S1 - Variables considered for inclusion in mixed model creation**

| Broad Category            | Detailed variables                                                                                                                                                                                                                                                                                                                                                                                                                                                                 |
|---------------------------|------------------------------------------------------------------------------------------------------------------------------------------------------------------------------------------------------------------------------------------------------------------------------------------------------------------------------------------------------------------------------------------------------------------------------------------------------------------------------------|
| Stove design              | <p><b>Stove ventilation (ventilated, unventilated, mixed, portable stove or firepit)</b></p> <p>Stove ventilated, unventilated or mixed ventilation*</p> <p>Stove ventilated, unventilated mixed or firepit</p> <p>Stove either firepit or other design (or mixed)</p> <p>Stove design as reported by study participant<sup>‡</sup></p>                                                                                                                                            |
| Fuel type/source          | <p>Major fuel type including smoky coal subtypes and county from which coal sourced (Fuyuan was divided into north/south)</p> <p>County from which fuel purchased</p> <p><b>Broad fuel types (smoky coal, smokeless coal, “mixed” coal, wood, plant materials, “mixed” fuels)</b></p> <p>Fuel type including smoky coal subtypes</p> <p>Fuel type including individual smoky coal mines</p> <p>Fuel type including smoky coal subtypes</p> <p>Weight of fuel used<sup>†</sup></p>  |
| Meteorological conditions | <p><b>Season of measurement</b></p> <p>Average daily temperature</p> <p>Average daily high temperature</p> <p>Average daily low temperature</p> <p>Average daily humidity</p> <p>Average daily wind speed</p> <p>Average daily maximum wind speed</p> <p>Average daily dew point</p> <p>Average daily rainfall</p>                                                                                                                                                                 |
| Other variables           | <p>Room size<sup>†</sup></p> <p>Phase of study during visit</p> <p>Number of owned stoves</p> <p>Number of doors in main cooking room</p> <p><b>Number of windows in main cooking room</b></p> <p>Presence or absence of a stairway in the main cooking room</p> <p><b>Hours of stove use standardized by number of used stoves</b></p> <p>Hours of stove use per measurement period</p> <p>Age of participant</p> <p>Month of visit</p> <p>Administrative borders<sup>‡</sup></p> |

\* refers to the use of multiple stoves with different ventilation designs.

<sup>‡</sup>categories are high stove, low stove (with or without ventilation), portable stove, firepit and multiple stoves.

<sup>†</sup>divided into quartiles.

<sup>‡</sup>townships/areas as defined by local administrative bodies.

Variables in bold were selected for model construction.

**Supplementary Table S2 - Linear mixed effect model indicating variables which contribute to differences between indoor and personal measurements**

|                                                                                      | Estimate ( $\beta$ ) | 95%CI       | GMR <sup>‡</sup> |
|--------------------------------------------------------------------------------------|----------------------|-------------|------------------|
| Ln(indoor PM <sub>2.5</sub> measurement), ln- $\mu\text{g}/\text{m}^3$               | 0.59                 | 0.53,0.66   | 1.80             |
| Average daily high temperature                                                       | -0.01                | -0.02,-0.01 | 0.99             |
| Weight of fuel (in quartiles)                                                        |                      |             |                  |
| 1                                                                                    | Ref.                 |             | 1.00             |
| 2                                                                                    | 0.06                 | -0.07,0.20  | 1.06             |
| 3                                                                                    | 0.18                 | 0.04,0.32   | 1.20             |
| 4                                                                                    | 0.15                 | 0.00,0.29   | 1.16             |
| Unknown                                                                              | 0.20                 | 0.03,0.36   | 1.22             |
| Variance explained                                                                   |                      |             |                  |
| Between subjects                                                                     |                      | 73%         |                  |
| Between villages                                                                     |                      | 100%*       |                  |
| Reference value <sup>†</sup> (ln personal measurement), ln- $\mu\text{g}/\text{m}^3$ |                      | 2.12        |                  |

<sup>‡</sup>Geometric mean ratio = GM(estimate)/GM(reference) =  $\exp(\beta)$ .

<sup>†</sup>Reference value represents base value of ln-transformed PM<sub>2.5</sub> in model for reference group [low weight fuel used coinciding with lowest ln-transformed indoor PM<sub>2.5</sub> (3.17) and temperature measurements (-0.4°C)].

\*Zero residual between village variance remained in the final model as a result of the high correlation between indoor and personal measurements.

**Supplementary Table S3 - Linear mixed effect modelling of ln-transformed indoor PM<sub>2.5</sub> exposure**

|                                                                                       |                             | Estimate( $\beta$ ) | 95% CI     | GMR <sup>‡</sup> |
|---------------------------------------------------------------------------------------|-----------------------------|---------------------|------------|------------------|
| <b>Fuel type</b>                                                                      |                             |                     |            |                  |
|                                                                                       | Smokeless coal              | Ref.                |            | 1.00             |
|                                                                                       | Smoky coal                  | 0.29                | 0.02,0.56  | 1.34             |
|                                                                                       | “Mixed” coal                | 0.22                | -0.08,0.52 | 1.24             |
|                                                                                       | Wood                        | 0.78                | 0.38,1.18  | 2.19             |
|                                                                                       | Plant materials             | 0.55                | 0.13,0.97  | 1.73             |
|                                                                                       | “Mixed” fuel                | 0.28                | 0.01,0.56  | 1.33             |
| <b>Stove design</b>                                                                   |                             |                     |            |                  |
|                                                                                       | Vented stove                | Ref.                |            | 1.00             |
|                                                                                       | Unvented stove              | 0.34                | 0.06,0.61  | 1.40             |
|                                                                                       | Portable stove              | 0.15                | -0.07,0.38 | 1.17             |
|                                                                                       | Firepit                     | 0.54                | 0.23,0.85  | 1.72             |
|                                                                                       | Mixed ventilation stove     | 0.20                | 0.02,0.37  | 1.21             |
|                                                                                       | Unknown ventilation stove   | -0.30               | -0.69,0.09 | 0.74             |
| <b>Number of windows in main cooking room</b>                                         |                             |                     |            |                  |
|                                                                                       | Zero                        | Ref.                |            | 1.00             |
|                                                                                       | One                         | 0.03                | -0.22,0.27 | 1.03             |
|                                                                                       | Two                         | -0.15               | -0.43,0.12 | 0.86             |
| <b>Season</b>                                                                         |                             |                     |            |                  |
|                                                                                       | Autumn                      | Ref.                |            | 1.00             |
|                                                                                       | Winter                      | 0.18                | 0.00,0.35  | 1.20             |
|                                                                                       | Spring                      | -0.12               | -0.28,0.05 | 0.89             |
|                                                                                       | Summer                      | -0.55               | -0.9,-0.2  | 0.58             |
| <b>Number of hours burning fuel standardized by number of used stoves<sup>§</sup></b> |                             |                     |            |                  |
|                                                                                       |                             | 0.00                | -0.02,0.01 | 1.00             |
| <b>Variation explained, %</b>                                                         |                             |                     |            |                  |
|                                                                                       | Between individual subjects |                     | 36         |                  |
|                                                                                       | Between villages            |                     | 63         |                  |
| <b>Reference value<sup>†</sup>, ln-<math>\mu\text{g}/\text{m}^3</math></b>            |                             |                     |            |                  |
|                                                                                       |                             |                     | 4.60       |                  |

<sup>‡</sup>Geometric mean ratio = GM(estimate)/GM(reference) = exp( $\beta$ ).

<sup>§</sup>Median period 4.3 hrs; IQR 2.2 to 9.6 hrs per stove.

<sup>†</sup>Reference value represents base value of ln-transformed PM<sub>2.5</sub> in model for reference group (smokeless coal burnt in a vented stove, during autumn in a room with no windows).
